# Supplementary material
Source: PubMed Central journal article supplement (PMC1895735)

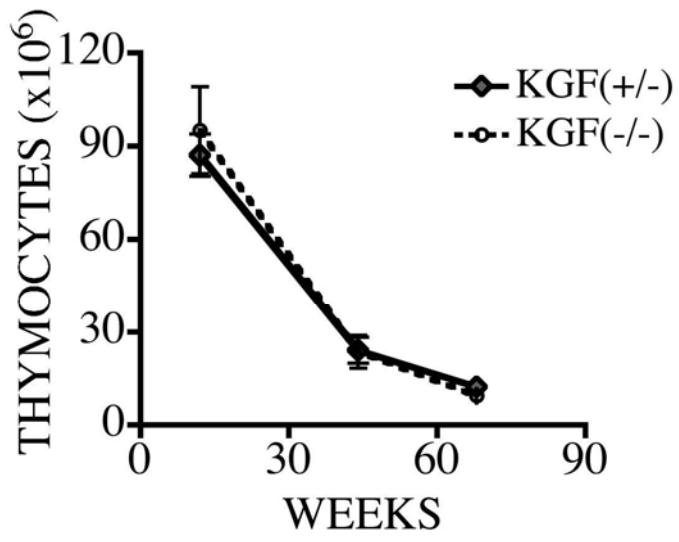

Supplement: blood_2005-07-2831_1.pdf [file blood_2005-07-2831_1.pdf]
